# Supplementary material
Source: PubMed Central journal article supplement (PMC3415537)
Supplement: mmc1.pdf [file mmc1.pdf]

## Supplemental Data

### A Functional Copy-Number Variation in *MAPKAPK2*

#### Predicts Risk and Survival of Lung Cancer

Bin Liu, Lei Yang, Binfang Huang, Mei Cheng, Hui Wang, Yinyan Li, Dongsheng Huang, Jian Zheng, Qingchu Li, Xin Zhang, Weidong Ji, Yifeng Zhou, and Jiachun Lu

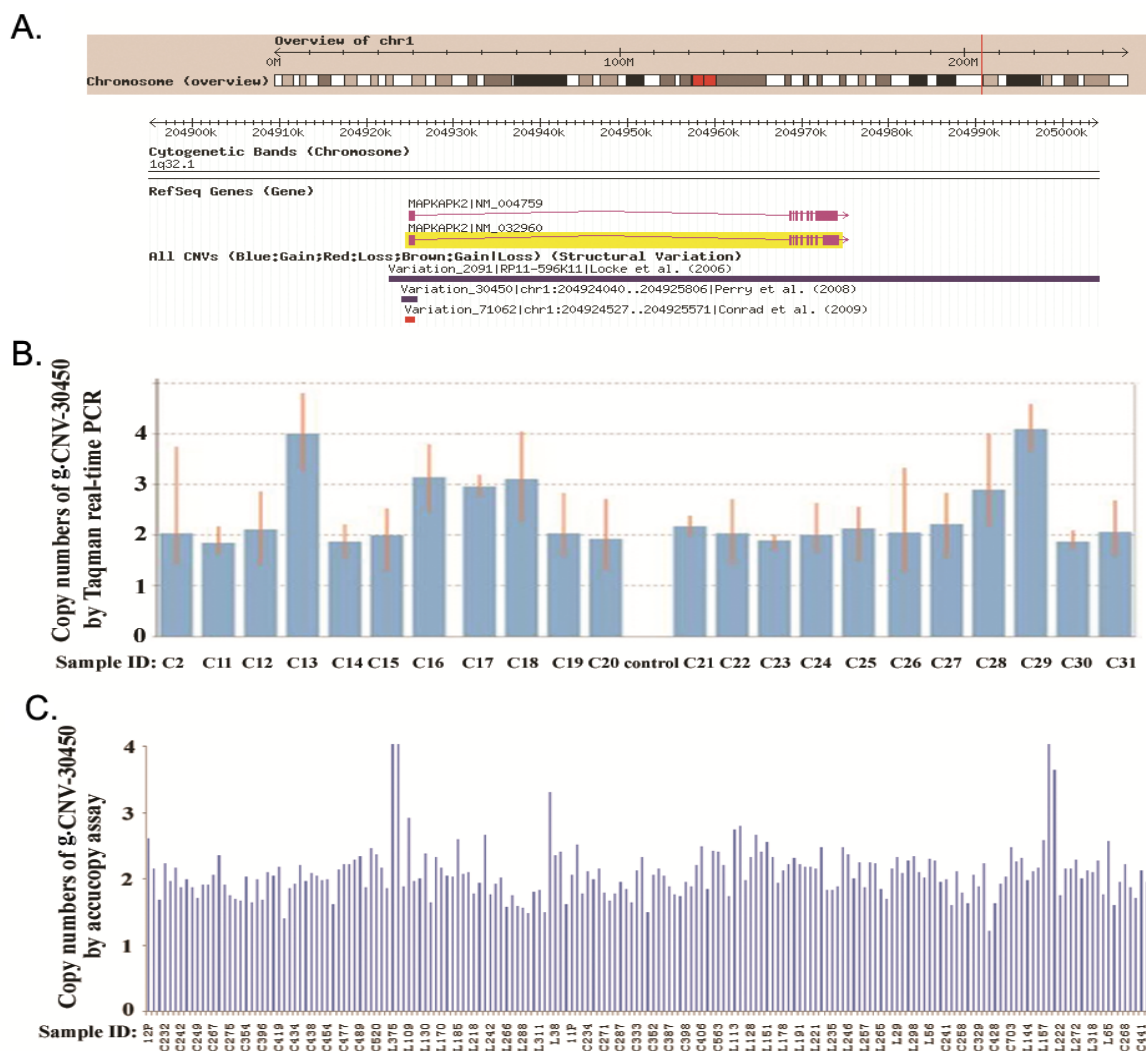

**Figure S1. The Chromosomal Location of *MAPKAPK2* with CNVs Information and Genotyping of g.CNV-30450**

(A) Schematic of *MAPKAPK2* in Chr.1q32 and the three identified CNVs.

**(B)** g.CNV-30450 genotyping by the Taqman real-time PCR: in 10 $\mu$ l reaction systems, triplicate 10-ng DNA samples were mixed with TaqMan PCR Master Mix (Applied Biosystems, Foster City, CA, USA), the control RNase P probe (VIC labeled, Applied Biosystems) and the experimental probe (FAM labeled, cat# Hs01173160 Applied Biosystems), then the mixture were run on an ABI 7900HT fast real-time PCR System (Applied Biosystems) and the genotypes were automatically determined by software CopyCaller 1.0 (Applied BioSystems). The mixture without genomic DNA was defined as zero copy number and 3 samples with two copies of g.CNV-30450 locus found by Affymetrix Genome-Wide Human SNP Array 6.0 were used as standard sample. Columns, mean from three independent experiments; bars, SD.

**(C)** g.CNV-30450 genotyping by the Accucopy assay with a patented Multiplex AccuCopy<sup>TM</sup> Kit (Genesky Bio-Tech Co., Ltd., Shanghai, China).

**A.**

**g.CNV-30450: 3 copies**

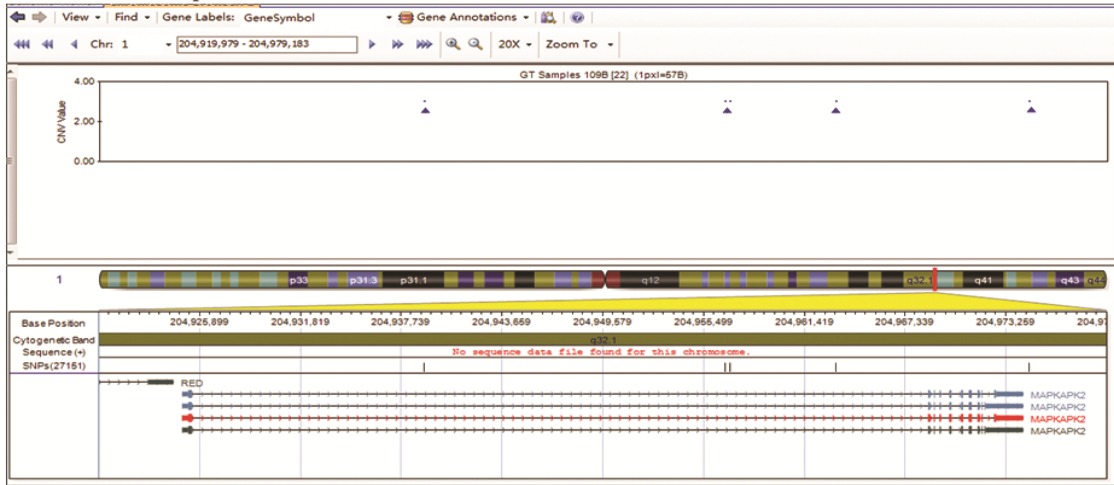

**B.**

**g.CNV-30450:4 copies**

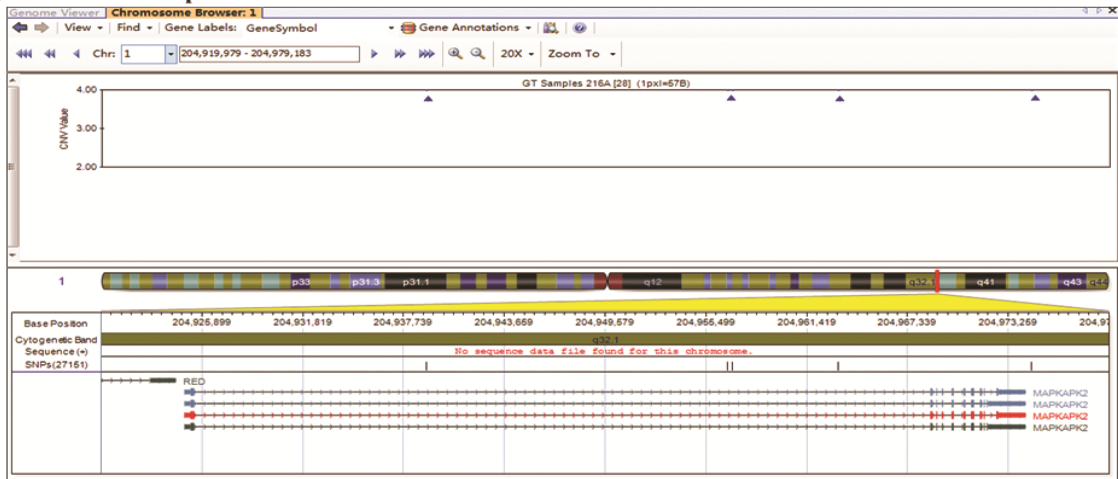

**Figure S2. *MAPKAPK2* g.CNV-30450 Calculation with Affymetrix Genome-wide Human SNP Array 6.0**

**(A)** 3-copy genotype.

**(B)** 4- copy genotype.

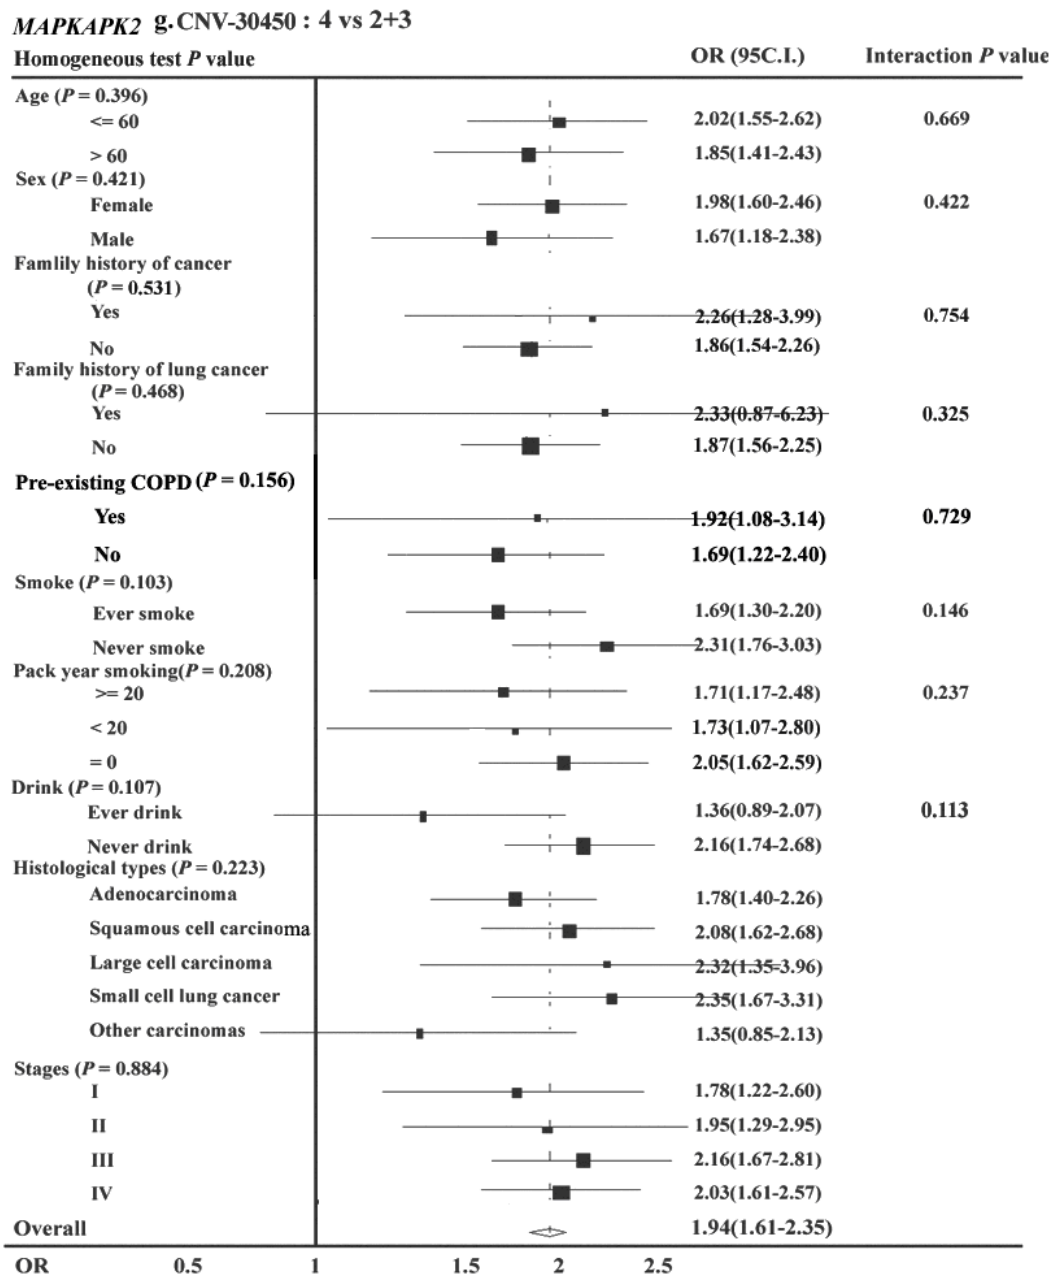

**Figure S3. Stratification Analysis of the g.CNV-30450 Genotypes and Lung Cancer Risk**  
*P* value for the homogeneity test in each stratum was tested by Breslow-Day Test. A multiplicative interaction model was applied for the interaction analysis.

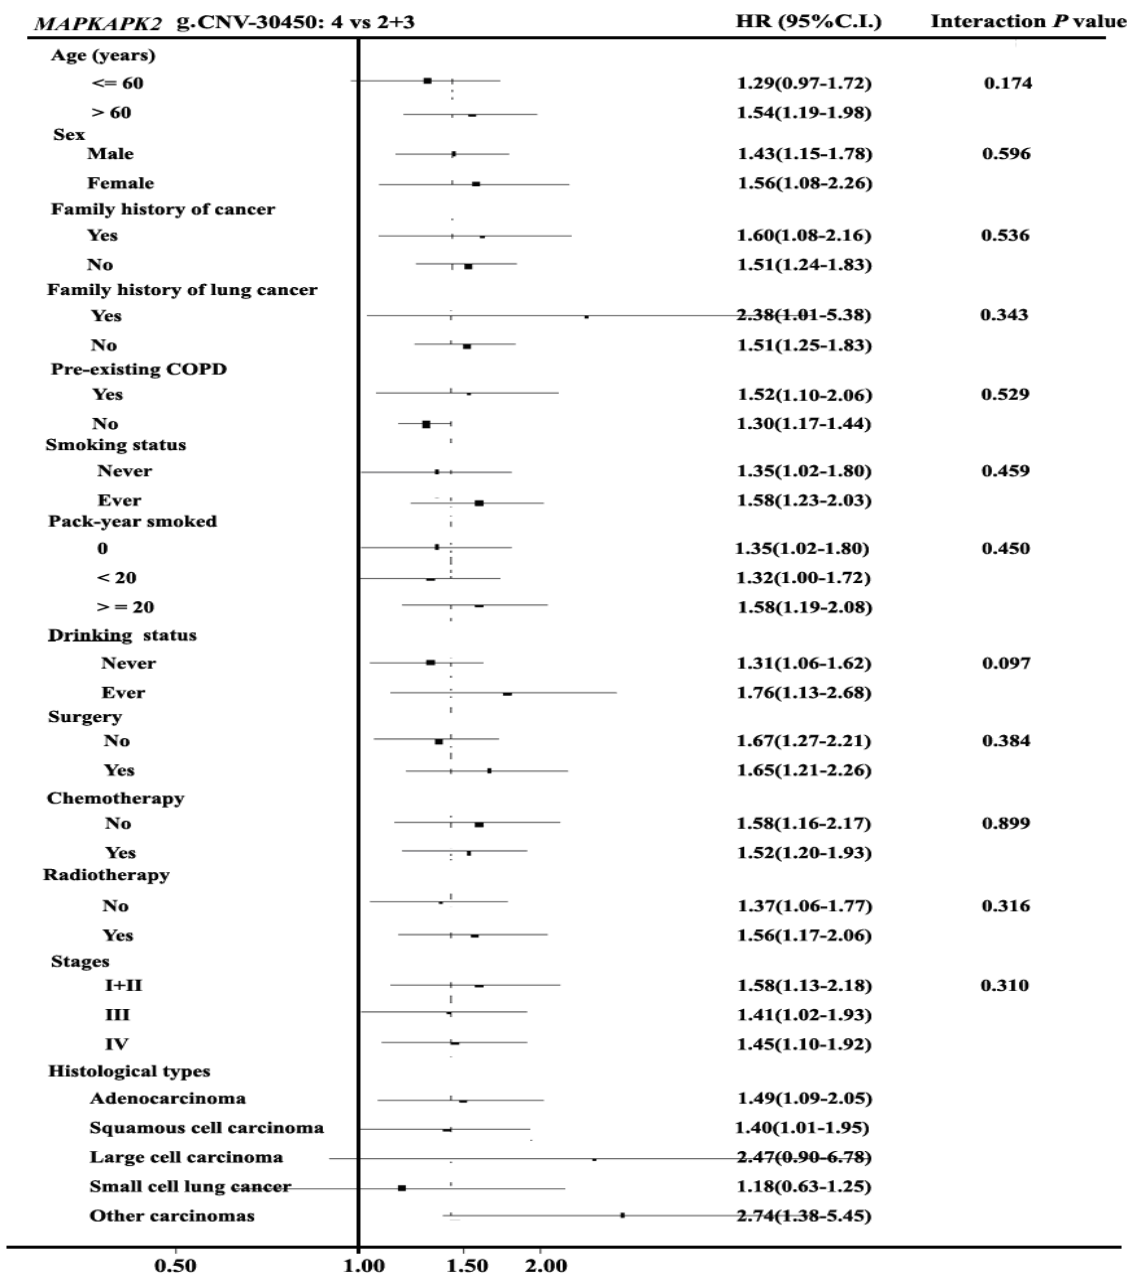

**Figure S4. Stratification Analysis of the g.CNV-30450 Genotypes and Lung Cancer Survival**

A multiplicative interaction model was supplied for the interaction analysis.

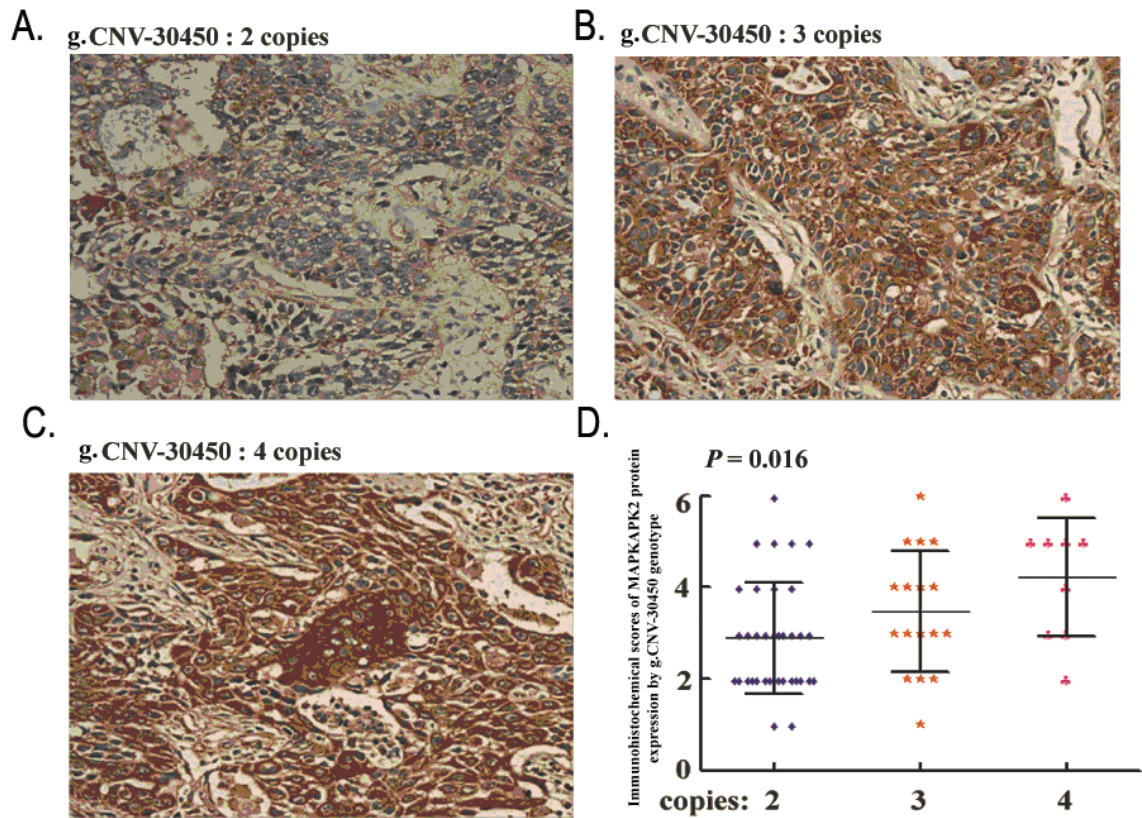

**Figure S5. MAPKAPK2 Protein Expressions in Lung Cancer Tissues In Situ by Immunohistochemistry**

The MAPKAPK2 cytoplasmic expression was scored to the sum of the intensity and percentage and defined as follows: 0-2, negative or weak; 3-4, moderate; and 5-6, strong by using the Image Pro Plus software. **A**, 2-copy genotype. **B**, 3-copy genotype. **C**, 4-copy genotype. **D**, MAPKAPK2 expression in situ by g.CNV-30450 genotypes. Columns, mean from three independent experiments; bars, SD. The copy number of g.CNV-30450 was CNV in blood DNA. The 4 copies of g.CNV-30450 had significantly higher MAPKAPK2 expressions (both intensity and positive percentage) than that of 2 or 3 copies as ANOVA test shown.

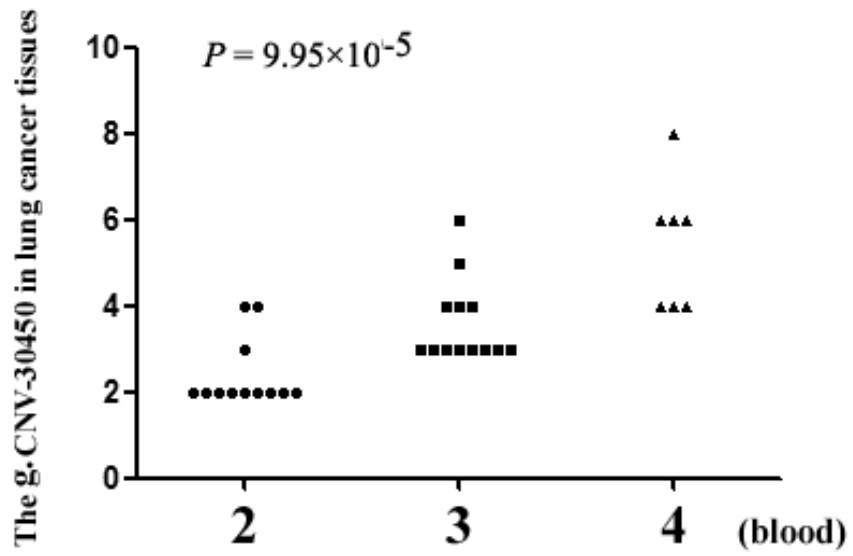

**Figure S6. The Relationship between g.CNV-30450 in Peripheral-Blood and Tumor Tissues**

The 4 copies genotype might cause a more copy number variation in somatic genome.

**Table S1.** Frequency Distributions of Selected Variables in Individuals with Lung Cancer and Cancer-free Controls

| Variables                     | Discovery set (Southern Chinese) |            |                        | Validation set I (Eastern Chinese) |           |                       | Validation set II (Southern Chinese) |           |                        |
|-------------------------------|----------------------------------|------------|------------------------|------------------------------------|-----------|-----------------------|--------------------------------------|-----------|------------------------|
|                               | Case                             | Control    | <i>P</i> <sup>a</sup>  | Case                               | Control   | <i>P</i> <sup>a</sup> | Case                                 | Control   | <i>P</i> <sup>a</sup>  |
|                               | (n=1056)                         | (n=1056)   |                        | (n=503)                            | (n=623)   |                       | (n=773)                              | (n=778)   |                        |
|                               | n (%)                            | n (%)      |                        | n (%)                              | n (%)     |                       | n (%)                                | n (%)     |                        |
| Age (years)                   |                                  |            |                        |                                    |           |                       |                                      |           |                        |
| ≤ 60                          | 536(50.8)                        | 534(50.6)  | 0.931                  | 273(54.3)                          | 343(55.1) | 0.793                 | 438(56.7)                            | 447(57.5) | 0.752                  |
| > 60                          | 520(49.2)                        | 522(49.4)  |                        | 230(45.7)                          | 280(44.9) |                       | 335(43.3)                            | 331(42.5) |                        |
| Sex                           |                                  |            |                        |                                    |           |                       |                                      |           |                        |
| Male                          | 746(70.6)                        | 746(70.6)  | 1.000                  | 345(66.6)                          | 433(70.4) | 0.496                 | 545(70.5)                            | 547(70.3) | 0.933                  |
| Female                        | 310(29.4)                        | 310(29.4)  |                        | 158(31.4)                          | 184(29.6) |                       | 228(29.5)                            | 231(29.7) |                        |
| Family history of cancer      |                                  |            |                        |                                    |           |                       |                                      |           |                        |
| Yes                           | 104(9.9)                         | 103(9.8)   | 0.942                  | 25(5.0)                            | 44(7.1)   | 0.046                 | 32(4.1)                              | 47(6.1)   | 0.088                  |
| No                            | 952(90.1)                        | 953(90.2)  |                        | 478(95.0)                          | 579(92.9) |                       | 741(95.9)                            | 730(93.9) |                        |
| Family history of lung cancer |                                  |            |                        |                                    |           |                       |                                      |           |                        |
| Yes                           | 42(4.0)                          | 30(2.8)    | 0.150                  | 10(2.0)                            | 13(2.1)   | 0.907                 | 27(3.5)                              | 14(1.8)   | 0.038                  |
| No                            | 1014(96.0)                       | 1026(97.2) |                        | 493(98.0)                          | 610(97.9) |                       | 746(96.5)                            | 763(98.2) |                        |
| Pre-existing COPD             |                                  |            |                        |                                    |           |                       |                                      |           |                        |
| Yes                           | 148(14.0)                        | 113(10.7)  | 0.021                  | 69(13.7)                           | 56(9.0)   | 0.012                 | 67(8.7)                              | 43(5.5)   | 0.016                  |
| No                            | 908(86.0)                        | 943(89.3)  |                        | 434(86.3)                          | 567(91.0) |                       | 706(91.3)                            | 735(94.5) |                        |
| Smoking status                |                                  |            |                        |                                    |           |                       |                                      |           |                        |
| Current                       | 394(37.3)                        | 366(34.6)  | 0.028                  | 118(23.5)                          | 168(26.6) | 1.79×10 <sup>-7</sup> | 187(24.2)                            | 219(28.1) | 4.99×10 <sup>-14</sup> |
| Former                        | 207(19.3)                        | 176(16.8)  |                        | 105(20.9)                          | 57(9.2)   |                       | 197(25.5)                            | 80(10.3)  |                        |
| Never                         | 455(43.1)                        | 514(48.7)  |                        | 280(55.6)                          | 400(64.2) |                       | 389(50.3)                            | 479(61.6) |                        |
| Pack-years smoked             |                                  |            |                        |                                    |           |                       |                                      |           |                        |
| ≥20                           | 459(43.5)                        | 314(29.7)  | 9.40×10 <sup>-12</sup> | 165(32.8)                          | 165(26.5) | 0.011                 | 291(37.7)                            | 218(28.0) | 3.34×10 <sup>-5</sup>  |
| <20                           | 142(13.4)                        | 228(21.6)  |                        | 58(11.5)                           | 58(9.3)   |                       | 93(12.0)                             | 81(10.4)  |                        |



|                               |           |           |       |           |           |       |           |           |       |
|-------------------------------|-----------|-----------|-------|-----------|-----------|-------|-----------|-----------|-------|
| 0                             | 455(43.1) | 514(48.7) |       | 280(55.7) | 400(64.2) |       | 389(50.3) | 479(61.6) |       |
| Drinking status               |           |           |       |           |           |       |           |           |       |
| Current                       | 165(15.6) | 186(17.6) | 0.042 | 36(7.2)   | 75(12.0)  | 0.017 | 80(10.4)  | 106(13.6) | 0.062 |
| Former                        | 64(6.1)   | 41(3.9)   |       | 28(5.6)   | 40(6.4)   |       | 75(9.7)   | 59(7.6)   |       |
| Never                         | 827(78.3) | 829(78.5) |       | 439(87.2) | 508(81.6) |       | 618(79.9) | 613(78.8) |       |
| Histological types            |           |           |       |           |           |       |           |           |       |
| Adenocarcinoma                | 384(36.4) |           |       | 231(45.9) |           |       | 330(42.7) |           |       |
| Squamous cell carcinoma       | 369(34.9) |           |       | 158(31.4) |           |       | 238(30.8) |           |       |
| Large cell carcinoma          | 43(4.1)   |           |       | 23(4.6)   |           |       | 35(4.5)   |           |       |
| Small cell lung cancer        | 128(12.1) |           |       | 65(12.9)  |           |       | 92(11.9)  |           |       |
| Other carcinomas <sup>b</sup> | 132(12.5) |           |       | 26(5.2)   |           |       | 78(10.1)  |           |       |
| Stages                        |           |           |       |           |           |       |           |           |       |
| I                             | 154(14.6) |           |       | 46(9.2)   |           |       | 98(12.7)  |           |       |
| II                            | 94(8.9)   |           |       | 53(10.5)  |           |       | 83(10.8)  |           |       |
| III                           | 333(31.5) |           |       | 157(31.2) |           |       | 214(27.7) |           |       |
| IV                            | 475(45.0) |           |       | 247(49.1) |           |       | 378(48.8) |           |       |

<sup>a</sup> *P* values for a  $\chi^2$  test.

<sup>b</sup> Mixed-cell or undifferentiated carcinoma.

**Table S2.** Analysis of the Effects of Lung Cancer-Affected Individuals' Characteristics and Clinical Features on Lung Cancer Survival

| Variables                     | Discovery set<br>(Southern Chinese) |                 | Validation set I<br>(Eastern Chinese) |                 | Validation set II<br>(Southern Chinese) |                 | MST<br>(months) | Log-rank<br><i>P</i> value  | Cox model<br>Crude<br>HR (95%CI) | Cox model<br>Adjust <sup>a</sup><br>HR (95%CI) |
|-------------------------------|-------------------------------------|-----------------|---------------------------------------|-----------------|-----------------------------------------|-----------------|-----------------|-----------------------------|----------------------------------|------------------------------------------------|
|                               | Case<br>n (%)                       | No. of<br>death | Case<br>n (%)                         | No. of<br>death | Case<br>n (%)                           | No. of<br>death |                 |                             |                                  |                                                |
| Total                         | 510                                 | 413             | 296                                   | 203             | 331                                     | 208             |                 |                             |                                  |                                                |
| Age (years)                   |                                     |                 |                                       |                 |                                         |                 |                 | <b>2.89×10<sup>-5</sup></b> |                                  |                                                |
| ≤ 60                          | 229 (44.9)                          | 190             | 151 (51.0)                            | 92              | 174 (52.6)                              | 94              | 16              |                             | 1.00 (ref.)                      | 1.00 (ref.)                                    |
| > 60                          | 281 (50.1)                          | 223             | 145 (49.0)                            | 111             | 157 (47.4)                              | 114             | 10              |                             | <b>1.33 (1.16-1.53)</b>          | <b>1.24 (1.07-1.44)</b>                        |
| Sex                           |                                     |                 |                                       |                 |                                         |                 |                 |                             | <b>0.044</b>                     |                                                |
| Male                          | 366 (71.8)                          | 301             | 200 (67.6)                            | 138             | 229 (69.2)                              | 144             | 13              |                             | 1.00 (ref.)                      | 1.00 (ref.)                                    |
| Female                        | 144 (28.2)                          | 112             | 96 (32.4)                             | 65              | 102 (30.8)                              | 64              | 15              |                             | <b>0.86 (0.74-1.00)</b>          | 0.91 (0.75-1.08)                               |
| Family history of cancer      |                                     |                 |                                       |                 |                                         |                 |                 |                             |                                  |                                                |
| No                            | 461 (90.4)                          | 372             | 285 (96.3)                            | 197             | 318 (96.1)                              | 202             | 13              | 0.194                       | 1.00 (ref.)                      | 1.00 (ref.)                                    |
| Yes                           | 49 (9.6)                            | 41              | 11 (3.7)                              | 6               | 13 (3.9)                                | 6               | 19              |                             | 0.84 (0.63-1.10)                 | 0.81 (0.61-1.06)                               |
| Family history of lung cancer |                                     |                 |                                       |                 |                                         |                 |                 |                             |                                  |                                                |
| No                            | 489 (95.9)                          | 397             | 292 (98.6)                            | 201             | 322 (97.3)                              | 203             | 13              | 0.108                       | 1.00 (ref.)                      | 1.00 (ref.)                                    |
| Yes                           | 21 (4.1)                            | 16              | 4 (1.4)                               | 2               | 9 (2.7)                                 | 5               | 17              |                             | 0.94 (0.84-1.04)                 | 0.89 (0.66-1.21)                               |
| Pre-existing COPD             |                                     |                 |                                       |                 |                                         |                 |                 |                             |                                  |                                                |
| No                            | 72(14.1)                            | 59              | 252(85.1)                             | 165             | 300(90.6)                               | 183             | 14              | <b>0.002</b>                | 1.00 (ref.)                      | 1.00 (ref.)                                    |
| Yes                           | 438(85.9)                           | 354             | 44(14.9)                              | 38              | 31(9.4)                                 | 25              | 10              |                             | <b>1.34 (1.11-1.64)</b>          | 1.15 (0.93-1.41)                               |
| Smoking status                |                                     |                 |                                       |                 |                                         |                 |                 |                             | <b>1.07×10<sup>-5</sup></b>      |                                                |
| Never                         | 211 (41.4)                          | 167             | 165 (55.7)                            | 106             | 181 (54.7)                              | 107             | 16              |                             | 1.00 (ref.)                      | 1.00 (ref.)                                    |
| Ever                          | 299 (58.6)                          | 246             | 131 (42.3)                            | 97              | 150 (45.3)                              | 101             | 11              |                             | <b>1.35 (1.18-1.55)</b>          | <b>1.19 (1.01-1.41)</b>                        |
| Pack-years smoked             |                                     |                 |                                       |                 |                                         |                 |                 |                             | <b>1.29×10<sup>-6</sup></b>      |                                                |
| 0                             | 221 (43.3)                          | 167             | 166 (56.1)                            | 107             | 181 (54.7)                              | 107             | 16              |                             | 1.00 (ref.)                      | 1.00 (ref.)                                    |
| <20                           | 59 (11.6)                           | 43              | 24 (8.1)                              | 17              | 26 (7.8)                                | 18              | 13              |                             | 1.11 (0.87-1.42)                 | 1.06 (0.81-1.39)                               |

|                         |            |     |            |     |            |     |    |                              |                         |                         |
|-------------------------|------------|-----|------------|-----|------------|-----|----|------------------------------|-------------------------|-------------------------|
| ≥20                     | 240 (47.1) | 203 | 106 (35.8) | 79  | 124 (34.5) | 83  | 11 |                              | <b>1.18 (1.10-1.28)</b> | <b>1.09 (1.00-1.20)</b> |
| Drinking status         |            |     |            |     |            |     |    | 0.212                        |                         |                         |
| Never                   | 401 (78.6) | 322 | 262 (88.5) | 178 | 288 (87.0) | 181 | 14 |                              | 1.00 (ref.)             | 1.00 (ref.)             |
| Ever                    | 109 (21.4) | 91  | 34 (11.5)  | 25  | 43 (13.0)  | 27  | 12 |                              | 1.12 (0.93-1.34)        | 1.08 (0.89-1.32)        |
| Surgery                 |            |     |            |     |            |     |    | <b>2.58×10<sup>-15</sup></b> |                         |                         |
| No                      | 334 (65.5) | 289 | 162 (54.7) | 133 | 191 (57.7) | 138 | 12 |                              | 1.00 (ref.)             | 1.00 (ref.)             |
| Yes                     | 176 (34.5) | 124 | 134 (45.3) | 70  | 140 (42.3) | 70  | 18 |                              | <b>0.56(0.49-0.65)</b>  | <b>0.57(0.49-0.66)</b>  |
| Chemotherapy            |            |     |            |     |            |     |    | <b>0.001</b>                 |                         |                         |
| No                      | 203 (39.8) | 162 | 85 (28.7)  | 60  | 91 (27.5)  | 61  | 9  |                              | 1.00 (ref.)             | 1.00 (ref.)             |
| Yes                     | 307 (60.2) | 251 | 211 (71.3) | 143 | 240 (72.5) | 147 | 15 |                              | <b>0.78(0.68-0.91)</b>  | <b>0.77(0.66-0.90)</b>  |
| Radiotherapy            |            |     |            |     |            |     |    | <b>0.001</b>                 |                         |                         |
| No                      | 274 (53.7) | 218 | 118 (39.9) | 82  | 153 (46.2) | 86  | 10 |                              | 1.00 (ref.)             | 1.00 (ref.)             |
| Yes                     | 236 (46.3) | 195 | 178 (60.1) | 121 | 178 (53.8) | 122 | 15 |                              | <b>0.80(0.69-0.91)</b>  | <b>0.86(0.75-0.99)</b>  |
| Stages                  |            |     |            |     |            |     |    | <b>6.58×10<sup>-10</sup></b> |                         |                         |
| I+ II                   | 96 (18.8)  | 56  | 58 (19.6)  | 33  | 75 (22.7)  | 29  | 24 |                              | 1.00 (ref.)             | 1.00 (ref.)             |
| III                     | 169 (33.1) | 145 | 94 (31.8)  | 63  | 96 (49.0)  | 67  | 12 |                              | <b>1.85 (1.48-2.32)</b> | <b>1.76 (1.40-2.21)</b> |
| IV                      | 245 (48.1) | 212 | 144 (48.6) | 107 | 160 (28.3) | 112 | 11 |                              | <b>1.35 (1.22-1.51)</b> | <b>1.38 (1.23-1.53)</b> |
| Histological types      |            |     |            |     |            |     |    | 0.588                        |                         |                         |
| Adenocarcinoma          | 179 (35.1) | 144 | 132 (44.6) | 89  | 148 (44.7) | 91  | 13 |                              | 1.00 (ref.)             | 1.00 (ref.)             |
| Squamous cell carcinoma | 164 (32.2) | 133 | 95 (32.1)  | 65  | 104 (31.4) | 66  | 15 |                              | 1.01 (0.86-1.19)        | 0.92 (0.78-1.11)        |
| Large cell carcinoma    | 24 (4.7)   | 17  | 17 (5.7)   | 12  | 19 (5.8)   | 12  | 11 |                              | 0.99 (0.84-1.17)        | 0.99 (0.82-1.18)        |
| Small cell lung cancer  | 62 (12.1)  | 52  | 39 (13.2)  | 30  | 42 (12.7)  | 31  | 13 |                              | 1.05 (0.97-1.13)        | 1.04 (0.97-1.13)        |
| Other <sup>b</sup>      | 81 (15.9)  | 67  | 13 (4.4)   | 7   | 18 (5.4)   | 8   | 15 |                              | 0.97 (0.91-1.05)        | 0.96 (0.90-1.25)        |

Abbreviations: MST, median survival time; HR, hazard ratio;

<sup>a</sup> Adjusted in a multivariate Cox regression model that included age, sex, pre-existing COPD, smoking status, stages, surgery, chemotherapy, and radiotherapy status.

<sup>b</sup> Mixed-cell or undifferentiated carcinoma.

**Table S3.** Multivariate Cox Regression Analysis of Surrounding Factors and Lung Cancer Survival

| Factors                           | HR (95%CI) <sup>a</sup> | COX mode <i>P</i> value      |
|-----------------------------------|-------------------------|------------------------------|
| age                               | <b>1.25 (1.08-1.45)</b> | <b>0.003</b>                 |
| sex                               | 0.92 (0.77-1.11)        | 0.390                        |
| Pre-existing COPD                 | 1.12 (0.91-1.38)        | 0.288                        |
| Smoking status                    | <b>1.20 (1.02-1.43)</b> | <b>0.032</b>                 |
| Surgery                           | <b>0.57 (0.49-0.67)</b> | <b>2.38×10<sup>-12</sup></b> |
| Chemotherapy                      | <b>0.78 (0.67-0.90)</b> | <b>0.001</b>                 |
| Radiotherapy                      | <b>0.85 (0.74-0.99)</b> | <b>0.031</b>                 |
| Stages                            | <b>1.26 (1.17-1.37)</b> | <b>1.97×10<sup>-9</sup></b>  |
| MAPKAPK2 g.CNV-30450 <sup>a</sup> | <b>1.49 (1.23-1.79)</b> | <b>3.63×10<sup>-5</sup></b>  |

<sup>a</sup>g.CNV-30450: 4 copies vs. 2/3 copies.

**Table S4.** The Primers Used for SYBR-Green Real-Time PCR

| Gene            | Primer                                                                         |
|-----------------|--------------------------------------------------------------------------------|
| <i>MAPKAPK2</i> | 5'-CAGCAGTTCCCGCAGTTC-3' (forward)<br>5'-CGAATTCTCCTGGGTCCTC-3' (reverse)      |
| <i>β-actin</i>  | 5'-GGCGGCACCACCATGTACCCT-3' (forward)<br>5'-AGGGGCCGGACTCGTCATACT-3' (reverse) |
